# Supplementary material for: Kinetic measurements give new insights into lipidmembrane permeabilization by α-synuclein oligomers
Source: Royal Society of Chemistry journal article supplement (doi:10.1039/c1mb05293d), 2011-10-18
Supplement: c1mb05293d.pdf [file c1mb05293d.pdf]

## SUPPORTING INFORMATION

### Kinetic measurements give new insights into lipid membrane permeabilization by $\alpha$ -synuclein oligomers

Martin Stöckl<sup>1</sup>, Mireille M. A. E. Claessens<sup>1</sup>, Vinod Subramaniam<sup>1,2</sup>

Nanobiophysics, <sup>1</sup> MESA+ Institute for Nanotechnology & <sup>2</sup> MIRA Institute for Biomedical Technology and Technical Medicine, University of Twente, P.O. Box 217, 7500 AE Enschede, The Netherlands

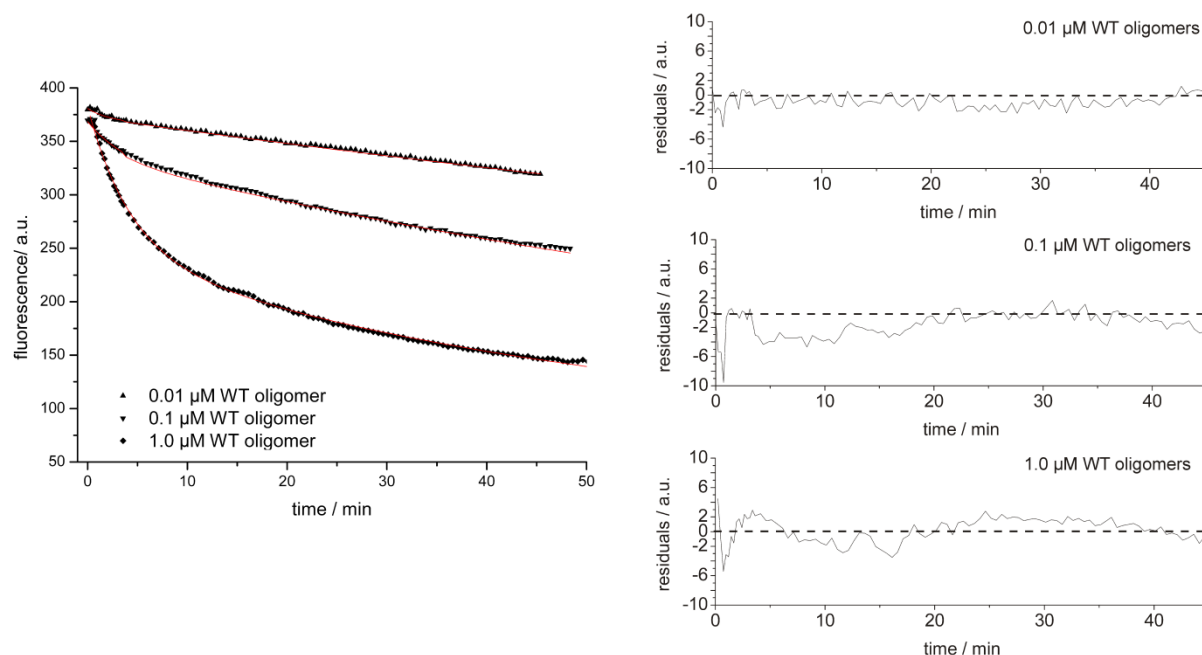

Suppl. Fig. 1: In POPG LUVs C6-NBD-PC was bleached in the outer leaflet by addition of dithionite. After 5 min  $\alpha$ -synuclein oligomers were added and the continuing influx of dithionite was followed. In the figures the kinetics of the loss of NBD fluorescence after addition of oligomers is shown. Time was set to zero for the timepoint of oligomer addition. Respective data points and corresponding fits (biexponential decays) as well as the residuals are shown.
